# Supplementary material for: Patterns of comorbidity and multimorbidity among middle-aged and elderly women in peri-urban Tanzania
Source: J Multimorb Comorb. 2022 Feb 22;12:26335565221076254. doi: 10.1177/26335565221076254 (PMC9106316; doi:10.1177/26335565221076254)
Supplement: sj-pdf-1-cob-10.1177_26335565221076254 – Supplemental Material for Patterns of comorbidity and multimorbidity among middle-aged and elderly women in peri-urban Tanzania [file sj-pdf-1-cob-10.1177_26335565221076254.pdf]

## Supplementary material

**Table S1:** Assessment and definition of chronic conditions

| Chronic condition           | Assessment                                                                                                                                                                                             | Definition                                                                                                                                               |
|-----------------------------|--------------------------------------------------------------------------------------------------------------------------------------------------------------------------------------------------------|----------------------------------------------------------------------------------------------------------------------------------------------------------|
| Anemia                      | 1. Hemoglobin point-of-care test<br>2. Self-report of smoking                                                                                                                                          | Hb < 12 mg/dl; threshold adjustments for smoking (+0.3 mg/dl) and African origin (−1 mg/dl)                                                              |
| Signs of alcohol problems   | CAGE questionnaire for problem drinking and potential alcohol problems                                                                                                                                 | CAGE score ≥ 2                                                                                                                                           |
| Signs of cognitive problems | 1. Self-rated present memory<br>2. Immediate and delayed word recall of 10 nouns, date, and president naming; scoring of correct answers; adapted from US Health and Retirement Study                  | Present memory rated as fair or poor, score ≤ 1.5 standard deviation of population mean                                                                  |
| Chronic cough, no TB        | Self-reported coughing                                                                                                                                                                                 | Self-report of usually coughing and not having TB as a chronic condition                                                                                 |
| Signs of depression         | 10-item Centre for Epidemiological Studies Depression Scale (CES-D-10)                                                                                                                                 | CES-D-10 score ≥ 10                                                                                                                                      |
| Diabetes                    | 1. Blood glucose point-of-care test<br>2. Self-report of current treatment                                                                                                                             | Blood glucose ≥ 200 mg/dl, fasting blood glucose ≥ 126 mg/dl, or currently on treatment for diabetes with diet, weight loss, pills, or insulin injection |
| Kidney disease              | Self-reported diagnosis                                                                                                                                                                                | Ever diagnosed with kidney disease or low kidney function                                                                                                |
| HIV                         | Self-reported diagnosis                                                                                                                                                                                | Ever tested HIV positive                                                                                                                                 |
| High cholesterol            | Self-reported diagnosis                                                                                                                                                                                | Ever diagnosed with high cholesterol                                                                                                                     |
| Hypertension                | 1. Blood pressure was measured up to three times, between the second and the third time was a delay of two minutes; the mean of all measurements was calculated<br>2. Self-report of current treatment | Systolic pressure ≥ 140 mmHg, diastolic pressure ≥ 90 mmHg or currently on treatment for hypertension                                                    |
| Ischemic heart disease      | 1. Self-reported diagnosis of angina, heart failure, or heart attack<br>2. Modified Rose Angina Questionnaire                                                                                          | Rose Angina Questionnaire criteria, ever received diagnosis of angina, or ever received diagnosis of heart attack                                        |
| Obesity                     | Measured weight and height; BMI was calculated                                                                                                                                                         | BMI > 30 kg/m <sup>2</sup>                                                                                                                               |
| Stroke                      | 1. Self-reported diagnosis<br>2. Self-reported treatment                                                                                                                                               | Ever diagnosed with stroke, mini-stroke, transient ischemic attack; suddenly lost half vision, or ever received treatment for stroke                     |
| Tuberculosis (TB)           | 1. Self-reported diagnosis<br>2. Self-reported treatment                                                                                                                                               | Ever diagnosed with TB, but never received treatment, or currently on TB treatment                                                                       |
| Underweight                 | Measured weight and height; BMI was calculated                                                                                                                                                         | BMI < 18.5 kg/m <sup>2</sup>                                                                                                                             |

Self-reported diagnoses were obtained by asking: Have you ever been told by a doctor, nurse, or other healthcare worker that you have had ... ? Rose Angina Questionnaire criteria were: Experienced any pain or discomfort in the chest or pain going to the left arm or neck when walking uphill or hurrying during the last 12 months; stopping, slowing down, or carrying on after taking a pain-relieving medicine that dissolves in the mouth (e.g., a nitro spray or tablet) when getting pain or discomfort while walking; and pain or discomfort is relieved when standing still.

**Table S2:** Prevalence of comorbidities among middle-aged and elderly women in peri-urban Tanzania (women aged 40+ years)

| Prevalence % [95% CI]         | Index condition     |                     |                     |                     |                     |                        |                     |                     |                     |                     |                     |                     |                     |                       |                     |
|-------------------------------|---------------------|---------------------|---------------------|---------------------|---------------------|------------------------|---------------------|---------------------|---------------------|---------------------|---------------------|---------------------|---------------------|-----------------------|---------------------|
|                               | Hyper-tension       | Obese               | Anemia              | CES-D-10 score ≥10  | Diabetes            | Ischemic heart disease | Cognitive problems  | HIV                 | High cholesterol    | CAGE Score 2+       | Tuber-culosis       | Stroke              | Under-weight        | Chronic cough (no TB) | Kidney disease      |
| Comorbidity                   |                     |                     |                     |                     |                     |                        |                     |                     |                     |                     |                     |                     |                     |                       |                     |
| Hypertension                  | 49.8 (47.2 to 52.3) | 57.0 (53.0 to 61.0) | 43.3 (38.1 to 48.6) | 48.8 (44.3 to 53.2) | 52.9 (46.9 to 58.8) | 55.6 (49.0 to 62.2)    | 62.1 (52.4 to 71.8) | 44.4 (34.6 to 54.1) | 66.3 (56.3 to 76.3) | 51.3 (40.3 to 62.2) | 41.1 (30.0 to 52.1) | 53.8 (42.6 to 65.1) | 45.9 (32.7 to 59.1) | 54.7 (41.5 to 67.9)   | 63.3 (49.8 to 76.8) |
| Anemia                        | 45.6 (42.0 to 49.3) | 39.9 (37.3 to 42.4) | 32.7 (27.6 to 37.8) | 40.0 (35.6 to 44.5) | 44.6 (38.7 to 50.5) | 44.4 (37.8 to 51.1)    | 26.6 (17.5 to 35.8) | 32.1 (22.9 to 41.3) | 64.6 (54.5 to 74.8) | 44.2 (33.2 to 55.1) | 32.9 (22.4 to 43.5) | 26.3 (16.2 to 36.4) | 0                   | 38.4 (25.3 to 51.4)   | 43.4 (29.4 to 57.3) |
| Obese                         | 32.1 (27.3 to 37.0) | 30.3 (25.1 to 35.5) | 36.9 (33.3 to 40.5) | 41.6 (35.2 to 48)   | 34.4 (28.0 to 40.9) | 45.4 (35.9 to 54.8)    | 46.0 (33.1 to 58.8) | 51.5 (38.5 to 64.6) | 27.5 (14.5 to 40.6) | 36.1 (22.6 to 49.6) | 49.9 (33.2 to 66.6) | 56.3 (40.5 to 72)   | 56.9 (39.5 to 74.4) | 26.0 (7.7 to 44.3)    | 37.7 (18.1 to 57.4) |
| Signs of depression           | 31.9 (28.5 to 35.2) | 32.7 (28.9 to 36.5) | 36.6 (31.5 to 41.8) | 32.5 (30.2 to 34.9) | 30.5 (25.0 to 36.1) | 56.4 (49.8 to 62.9)    | 46.7 (37 to 56.5)   | 37 (27.5 to 46.5)   | 23.3 (14.3 to 32.2) | 32.5 (22.2 to 42.8) | 55.0 (43.9 to 66)   | 35.7 (24.9 to 46.5) | 41.8 (28.9 to 54.8) | 35.0 (22.3 to 47.6)   | 35 (21.6 to 48.3)   |
| Diabetes                      | 32.8 (28.2 to 37.4) | 34.6 (29.3 to 39.8) | 28.8 (23.5 to 34.2) | 29.0 (23.2 to 34.8) | 30.9 (27.6 to 34.2) | 32.1 (23.4 to 40.8)    | 34.6 (22.5 to 46.7) | 34.3 (21.4 to 47.2) | 39.7 (26.5 to 52.9) | 34.8 (21.7 to 48)   | 23.5 (7.4 to 39.5)  | 48.3 (32.7 to 64)   | 23.0 (8.5 to 37.5)  | 49.1 (28.6 to 69.6)   | 34.6 (15.3 to 53.8) |
| Ischemic heart disease        | 16.1 (13.5 to 18.7) | 16.1 (13.1 to 19.0) | 17.8 (13.7 to 21.8) | 25.0 (21.2 to 28.8) | 15 (10.8 to 19.2)   | 14.4 (12.7 to 16.2)    | 20.1 (12.4 to 27.8) | 11.9 (5.6 to 18.2)  | 29 (19.4 to 38.6)   | 22.4 (13.3 to 31.6) | 33.0 (22.6 to 43.3) | 27.7 (17.6 to 37.7) | 13.6 (4.6 to 22.5)  | 20.0 (9.4 to 30.6)    | 20.3 (9.1 to 31.6)  |
| Cognitive impairment symptoms | 8.6 (6.6 to 10.6)   | 4.6 (2.8 to 6.4)    | 8.6 (5.8 to 11.4)   | 9.9 (7.2 to 12.6)   | 7.7 (4.8 to 10.7)   | 9.6 (5.7 to 13.5)      | 6.9 (5.6 to 8.2)    | 3 (−0.3 to 6.4)     | 2.4 (−0.9 to 5.8)   | 3.8 (−0.4 to 8.1)   | 7.7 (1.8 to 13.6)   | 7.7 (1.5 to 13.9)   | 22.4 (11.3 to 33.6) | 15.4 (5.7 to 25.1)    | 8.6 (0.6 to 16.5)   |
| HIV                           | 5.9 (4.2 to 7.6)    | 5.3 (3.5 to 7.1)    | 9.3 (6.4 to 12.1)   | 7.5 (5.2 to 9.9)    | 7.4 (4.3 to 10.4)   | 5.5 (2.5 to 8.5)       | 2.9 (−0.3 to 6.1)   | 6.6 (5.4 to 7.9)    | 8.1 (2.3 to 13.9)   | 15.9 (7.7 to 24.1)  | 21.4 (12.4 to 30.4) | 7.9 (1.8 to 14.0)   | 13.4 (4.7 to 22.1)  | 5.4 (−0.5 to 11.4)    | 4.1 (−1.5 to 9.8)   |
| High cholesterol              | 7.5 (5.6 to 9.4)    | 9.2 (6.9 to 11.5)   | 4.2 (2.1 to 6.4)    | 4.0 (2.3 to 5.8)    | 7.3 (4.5 to 10.1)   | 11.4 (7.2 to 15.6)     | 2 (−0.7 to 4.7)     | 6.9 (2 to 11.9)     | 5.7 (4.5 to 6.8)    | 6.2 (0.9 to 11.5)   | 7.6 (1.7 to 13.4)   | 9.2 (2.7 to 15.7)   | 1.8 (−1.7 to 5.2)   | 5.5 (−0.5 to 11.5)    | 16.2 (5.9 to 26.5)  |
| Signs of alcohol problems     | 5.4 (3.8 to 7.0)    | 5.8 (4.0 to 7.7)    | 5.1 (3.0 to 7.3)    | 5.3 (3.3 to 7.2)    | 5.9 (3.4 to 8.5)    | 8.2 (4.5 to 11.8)      | 2.9 (−0.3 to 6.2)   | 12.6 (6.0 to 19.2)  | 5.8 (0.9 to 10.7)   | 5.3 (4.1 to 6.4)    | 6.3 (1 to 11.6)     | 7.9 (1.8 to 14.0)   | 5.1 (−0.5 to 10.8)  | 12.6 (3.9 to 21.4)    | 2.1 (−2 to 6.2)     |
| Tuberculosis                  | 4.3 (2.8 to 5.8)    | 4.3 (2.7 to 5.9)    | 7.0 (4.3 to 9.8)    | 8.8 (6.3 to 11.3)   | 3.9 (1.2 to 6.7)    | 11.9 (7.6 to 16.2)     | 5.8 (1.3 to 10.3)   | 16.8 (9.5 to 24.1)  | 7 (1.6 to 12.4)     | 6.2 (0.9 to 11.5)   | 5.2 (4.1 to 6.3)    | 9.3 (2.7 to 15.9)   | 8.9 (1.5 to 16.3)   | 0                     | 6.2 (−0.6 to 12.9)  |
| Stroke                        | 5.4 (3.8 to 7.0)    | 3.3 (1.9 to 4.7)    | 7.6 (5.0 to 10.3)   | 5.5 (3.5 to 7.5)    | 7.8 (4.9 to 10.7)   | 9.6 (5.7 to 13.5)      | 5.6 (1 to 10.1)     | 6.0 (1.3 to 10.6)   | 8.1 (2.4 to 13.9)   | 7.5 (1.7 to 13.3)   | 9.0 (2.6 to 15.3)   | 5 (3.9 to 6.1)      | 5.8 (−0.5 to 12.2)  | 18.2 (8 to 28.3)      | 14.3 (4.5 to 24.1)  |
| Underweight                   | 3.7 (2.3 to 5.1)    | 0                   | 6.2 (3.8 to 8.5)    | 5.1 (3.1 to 7.2)    | 3.0 (1.0 to 5.0)    | 3.8 (1.1 to 6.4)       | 13.0 (6.0 to 20.0)  | 8.1 (2.7 to 13.4)   | 1.3 (−1.2 to 3.7)   | 3.9 (−0.4 to 8.2)   | 6.8 (1.1 to 12.6)   | 4.7 (−0.4 to 9.7)   | 4.0 (3.0 to 5.0)    | 3.2 (−2.3 to 8.7)     | 6.7 (−0.5 to 14)    |
| Chronic cough, no TB          | 4.0 (2.6 to 5.4)    | 3.5 (2.0 to 5.0)    | 2.6 (0.7 to 4.5)    | 3.9 (2.2 to 5.7)    | 5.8 (3.0 to 8.5)    | 5.1 (2.1 to 8)         | 8.1 (2.8 to 13.5)   | 3.0 (−0.3 to 6.3)   | 3.5 (−0.4 to 7.4)   | 8.8 (2.6 to 15)     | 0                   | 13.2 (5.6 to 20.9)  | 2.9 (−2.1 to 8.0)   | 3.6 (2.7 to 4.6)      | 8.3 (0.5 to 16.1)   |
| Kidney disease                | 4.1 (2.7 to 5.5)    | 3.5 (2.0 to 5.0)    | 3.3 (1.4 to 5.2)    | 3.5 (1.9 to 5.1)    | 3.6 (1.4 to 5.8)    | 4.6 (1.8 to 7.3)       | 4 (0.2 to 7.9)      | 2.0 (−0.8 to 4.8)   | 9.3 (3.1 to 15.4)   | 1.3 (−1.2 to 3.8)   | 3.8 (−0.4 to 8.1)   | 9.3 (2.7 to 15.8)   | 5.5 (−0.5 to 11.4)  | 7.4 (0.4 to 14.3)     | 3.2 (2.3 to 4.1)    |

N = 1528 after multiple imputation of missing data. Top-left to bottom-right diagonal values represent the unconditional prevalence of the chronic condition.

**Table S2:** Prevalence of comorbidities among middle-aged and elderly women in peri-urban Tanzania (continued for women aged 40–49 years)

| Prevalence % [95% CI]                | Index condition     |                     |                     |                     |                     |                        |                     |                     |                     |                     |                     |                     |                     |                       |                     |
|--------------------------------------|---------------------|---------------------|---------------------|---------------------|---------------------|------------------------|---------------------|---------------------|---------------------|---------------------|---------------------|---------------------|---------------------|-----------------------|---------------------|
|                                      | Hyper-tension       | Obese               | Anemia              | CES-D-10 score ≥10  | Diabetes            | Ischemic heart disease | Cognitive problems  | HIV                 | High cholesterol    | CAGE Score 2+       | Tuber-culosis       | Stroke              | Under-weight        | Chronic cough (no TB) | Kidney disease      |
| Comorbidity                          |                     |                     |                     |                     |                     |                        |                     |                     |                     |                     |                     |                     |                     |                       |                     |
| <b>Hypertension</b>                  | 38.0 (34.4 to 41.5) | 47.2 (41.4 to 52.9) | 32.4 (25.9 to 38.9) | 37.8 (31.2 to 44.3) | 40.3 (31.6 to 49.0) | 41.8 (30.7 to 52.8)    | 52 (27 to 77)       | 43.4 (30.6 to 56.1) | 50.1 (30.8 to 69.3) | 39.7 (24.1 to 55.3) | 41 (23.1 to 58.9)   | 37.7 (20.9 to 54.5) | 31.4 (10.8 to 52)   | 30.6 (11.7 to 49.4)   | 50.2 (25.7 to 74.7) |
| <b>Anemia</b>                        | 49.9 (43.9 to 55.9) | 40.2 (36.6 to 43.8) | 33.1 (26.4 to 39.7) | 44 (37.3 to 50.7)   | 43.5 (34.7 to 52.4) | 45.5 (34.3 to 56.6)    | 40.3 (15.6 to 65)   | 34.8 (22.5 to 47.2) | 57.7 (38.6 to 76.7) | 44.8 (29 to 60.7)   | 35.1 (17.6 to 52.5) | 21.2 (6.5 to 35.9)  | 0                   | 52.8 (31.6 to 74)     | 39.6 (14.9 to 64.3) |
| <b>Obese</b>                         | 34.2 (26.7 to 41.6) | 33.0 (25.7 to 40.3) | 40.1 (35.1 to 45.1) | 43.8 (34.7 to 52.8) | 39.6 (30.1 to 49.1) | 44.9 (31.2 to 58.6)    | 37.8 (8.2 to 67.3)  | 48.7 (33 to 64.3)   | 31.4 (8.1 to 54.6)  | 40.1 (20 to 60.2)   | 54.3 (31.3 to 77.3) | 52.7 (31.3 to 74.1) | 60.7 (34.3 to 87.2) | 24.4 (1 to 47.9)      | 49.5 (17.2 to 81.7) |
| <b>Signs of depression</b>           | 29.1 (23.7 to 34.5) | 32.0 (26.6 to 37.4) | 31.9 (25.4 to 38.5) | 29.3 (26 to 32.6)   | 26.9 (19.2 to 34.7) | 51.3 (40.2 to 62.4)    | 42.1 (18.6 to 65.6) | 38.1 (25.6 to 50.6) | 26.8 (9.8 to 43.8)  | 41.9 (26.2 to 57.7) | 47.9 (29.7 to 66.1) | 28.1 (12.5 to 43.7) | 30.5 (10.3 to 50.6) | 47.7 (27.3 to 68.2)   | 43.7 (19.4 to 68)   |
| <b>Diabetes</b>                      | 27.9 (20.9 to 34.8) | 28.4 (21.3 to 35.6) | 25.9 (19 to 32.8)   | 24.2 (16.2 to 32.2) | 26.3 (21.6 to 30.9) | 24.6 (12.4 to 36.7)    | 23.9 (–1.3 to 49.1) | 30.3 (14.7 to 46.0) | 22.7 (1.5 to 44.0)  | 24.1 (6.7 to 41.4)  | 21.3 (2.4 to 40.2)  | 40.5 (19.6 to 61.4) | 19 (–1.2 to 39.2)   | 39.3 (12.8 to 65.8)   | 29.5 (0.2 to 58.8)  |
| <b>Ischemic heart disease</b>        | 11.7 (7.9 to 15.5)  | 12 (8.3 to 15.8)    | 11.9 (7.6 to 16.2)  | 18.7 (13.4 to 23.9) | 10.0 (4.9 to 15)    | 10.6 (8.4 to 12.9)     | 0                   | 10.2 (2.5 to 18.0)  | 34.5 (16.2 to 52.7) | 15.7 (4.2 to 27.3)  | 26.6 (10.8 to 42.5) | 24.9 (9.9 to 39.9)  | 4.8 (–4.4 to 13.9)  | 17.4 (1.9 to 32.9)    | 18.7 (–0.4 to 37.8) |
| <b>Cognitive impairment symptoms</b> | 3.2 (1.1 to 5.4)    | 2.4 (0.6 to 4.2)    | 2.2 (0.2 to 4.2)    | 3.4 (0.9 to 5.8)    | 2.1 (–0.3 to 4.6)   | 0                      | 2.4 (1.2 to 3.5)    | 1.7 (–1.6 to 5)     | 0                   | 0                   | 3.3 (–3.1 to 9.7)   | 0                   | 5.3 (–4.7 to 15.2)  | 0                     | 0                   |
| <b>HIV</b>                           | 9.1 (5.7 to 12.6)   | 6.9 (4.0 to 9.9)    | 9.7 (5.9 to 13.6)   | 10.4 (6.3 to 14.6)  | 9.3 (4.1 to 14.4)   | 7.7 (1.8 to 13.6)      | 5.8 (–5.3 to 16.8)  | 8.0 (6.0 to 10.0)   | 7.7 (–2.6 to 17.9)  | 19.4 (6.6 to 32.2)  | 30 (13.5 to 46.4)   | 12.5 (1 to 23.9)    | 33.5 (13.1 to 53.9) | 13 (–0.7 to 26.8)     | 6.4 (–5.7 to 18.4)  |
| <b>High cholesterol</b>              | 4.7 (2.2 to 7.2)    | 5.1 (2.6 to 7.6)    | 2.8 (0.5 to 5.1)    | 3.3 (0.9 to 5.6)    | 3.1 (0 to 6.2)      | 11.5 (4.4 to 18.6)     | 0                   | 3.4 (–1.2 to 8.1)   | 3.6 (2.2 to 4.9)    | 2.6 (–2.5 to 7.8)   | 0                   | 3.1 (–2.9 to 9.1)   | 0                   | 4.3 (–4 to 12.7)      | 18.6 (–0.4 to 37.6) |
| <b>Signs of alcohol problems</b>     | 5.4 (2.8 to 8.1)    | 5.8 (3.1 to 8.5)    | 5.2 (2.2 to 8.2)    | 7.5 (3.9 to 11)     | 4.8 (1.1 to 8.5)    | 7.7 (1.8 to 13.6)      | 0                   | 12.6 (4 to 21.2)    | 3.9 (–3.6 to 11.3)  | 5.2 (3.6 to 6.8)    | 6.7 (–2.3 to 15.6)  | 12.6 (1 to 24.1)    | 9.4 (–3.1 to 21.9)  | 17.4 (1.9 to 33.0)    | 6.3 (–5.7 to 18.3)  |
| <b>Tuberculosis</b>                  | 4.4 (2.0 to 6.9)    | 3.6 (1.4 to 5.7)    | 5.6 (2.5 to 8.6)    | 6.7 (3.3 to 10.1)   | 3.3 (0.2 to 6.5)    | 10.3 (3.5 to 17.0)     | 5.8 (–5.3 to 16.8)  | 15.3 (6.1 to 24.6)  | 0                   | 5.3 (–1.8 to 12.4)  | 4.1 (2.7 to 5.5)    | 3.1 (–2.9 to 9.2)   | 9.6 (–3.1 to 22.3)  | 0                     | 12.6 (–3.7 to 28.9) |
| <b>Stroke</b>                        | 4.3 (1.9 to 6.8)    | 2.3 (0.5 to 4.1)    | 5.8 (2.7 to 8.8)    | 4.2 (1.5 to 6.9)    | 6.8 (2.6 to 10.9)   | 10.2 (3.5 to 17.0)     | 0                   | 6.8 (0.4 to 13.3)   | 3.8 (–3.5 to 11.2)  | 10.6 (0.8 to 20.4)  | 3.4 (–3.1 to 9.8)   | 4.4 (2.9 to 5.9)    | 5.4 (–4.8 to 15.6)  | 8.7 (–2.8 to 20.2)    | 12.5 (–3.7 to 28.6) |
| <b>Underweight</b>                   | 2.4 (0.5 to 4.3)    | 0                   | 4.4 (1.8 to 7)      | 3.0 (0.7 to 5.4)    | 2.1 (–0.3 to 4.5)   | 1.3 (–1.2 to 3.8)      | 6.5 (–5.8 to 18.8)  | 12.1 (3.7 to 20.6)  | 0                   | 5.2 (–1.8 to 12.3)  | 6.8 (–2.3 to 15.9)  | 3.6 (–3.3 to 10.4)  | 2.9 (1.7 to 4.1)    | 0                     | 6.9 (–6 to 19.8)    |
| <b>Chronic cough, no TB</b>          | 2.5 (0.7 to 4.4)    | 4.1 (1.8 to 6.4)    | 1.9 (–0.1 to 3.9)   | 5.1 (2.2 to 8.1)    | 4.7 (1.1 to 8.3)    | 5.1 (0.2 to 10.0)      | 0                   | 5.1 (–0.5 to 10.8)  | 3.8 (–3.5 to 11.2)  | 10.5 (0.8 to 20.3)  | 0                   | 6.2 (–2.1 to 14.6)  | 0                   | 3.1 (1.9 to 4.4)      | 6.3 (–5.6 to 18.1)  |
| <b>Kidney disease</b>                | 2.9 (0.9 to 4.9)    | 2.2 (0.5 to 3.9)    | 2.7 (0.5 to 4.9)    | 3.3 (0.9 to 5.7)    | 2.5 (–0.3 to 5.2)   | 3.9 (–0.4 to 8.2)      | 0                   | 1.8 (–1.7 to 5.2)   | 11.5 (–0.8 to 23.7) | 2.7 (–2.5 to 7.8)   | 6.7 (–2.3 to 15.8)  | 6.3 (–2.2 to 14.7)  | 5.2 (–4.6 to 15.1)  | 4.4 (–4 to 12.8)      | 2.2 (1.1 to 3.3)    |

N = 733 after multiple imputation of missing data. Top-left to bottom-right diagonal values represent the unconditional prevalence of the chronic condition.

**Table S2:** Prevalence of comorbidities among middle-aged and elderly women in peri-urban Tanzania (continued for women aged 50–59 years)

| Prevalence % [95% CI]         | Index condition     |                     |                     |                     |                     |                        |                     |                     |                     |                     |                     |                     |                      |                       |                     |  |
|-------------------------------|---------------------|---------------------|---------------------|---------------------|---------------------|------------------------|---------------------|---------------------|---------------------|---------------------|---------------------|---------------------|----------------------|-----------------------|---------------------|--|
|                               | Hyper-tension       | Obese               | Anemia              | CES-D-10 score ≥10  | Diabetes            | Ischemic heart disease | Cognitive problems  | HIV                 | High cholesterol    | CAGE Score 2+       | Tuber-culosis       | Stroke              | Under-weight         | Chronic cough (no TB) | Kidney disease      |  |
| Comorbidity                   |                     |                     |                     |                     |                     |                        |                     |                     |                     |                     |                     |                     |                      |                       |                     |  |
| Hypertension                  | 54.4 (49.3 to 59.5) | 59.3 (51.8 to 66.9) | 46.8 (35.9 to 57.8) | 49.7 (40.8 to 58.6) | 55.8 (46.4 to 65.3) | 59 (46.7 to 71.4)      | 67 (41.4 to 92.6)   | 50.6 (31.4 to 69.9) | 67.8 (51.3 to 84.3) | 61.2 (42.3 to 80.1) | 41.7 (22 to 61.5)   | 52.7 (30.2 to 75.2) | 50.9 (16.5 to 85.2)  | 63.5 (34.9 to 92.0)   | 58.2 (30.2 to 86.2) |  |
| Anemia                        | 48.6 (41.6 to 55.6) | 44.6 (39.5 to 49.7) | 36.1 (25 to 47.2)   | 41.9 (33.1 to 50.6) | 51.5 (41.9 to 61.1) | 59.1 (46.7 to 71.4)    | 67.6 (42 to 93.1)   | 34.2 (16 to 52.4)   | 66.8 (49.9 to 83.6) | 50.0 (30.7 to 69.3) | 21.5 (4.9 to 38.1)  | 36.9 (15.1 to 58.7) | 0                    | 27.2 (0.9 to 53.6)    | 50 (21.6 to 78.4)   |  |
| Obese                         | 25.8 (17.6 to 34.0) | 24.3 (15.2 to 33.4) | 30 (23.3 to 36.6)   | 39.5 (28.1 to 50.9) | 27.5 (17.6 to 37.5) | 44.3 (28.1 to 60.4)    | 50.2 (16.8 to 83.6) | 59.1 (35.2 to 83.1) | 26.2 (6.5 to 45.8)  | 24.4 (3 to 45.8)    | 52.0 (24.9 to 79.2) | 62.9 (35.5 to 90.4) | 42.4 (1.6 to 83.2)   | 25.6 (−8.4 to 59.6)   | 0                   |  |
| Signs of depression           | 30 (23.7 to 36.4)   | 30.9 (23.8 to 38)   | 43.4 (32.3 to 54.6) | 32.9 (28.1 to 37.7) | 29.4 (20.5 to 38.2) | 54.1 (41.6 to 66.7)    | 49.9 (23.7 to 76.2) | 37.9 (19.3 to 56.5) | 19.4 (5.4 to 33.4)  | 26.9 (9.8 to 44.0)  | 59.9 (40.7 to 79.2) | 47.4 (24.9 to 69.9) | 38.3 (4.9 to 71.7)   | 18.3 (−4.7 to 41.2)   | 25.0 (0.4 to 49.6)  |  |
| Diabetes                      | 39.7 (30.5 to 49.0) | 44.7 (34.3 to 55.1) | 35.6 (23.4 to 47.8) | 34.5 (23.7 to 45.4) | 38.7 (31.4 to 46)   | 42.4 (26 to 58.7)      | 42.8 (8.4 to 77.2)  | 40.7 (16.4 to 64.9) | 49.6 (28.7 to 70.5) | 47.9 (24.3 to 71.5) | 28.0 (1.9 to 54.2)  | 64.8 (37.1 to 92.5) | 0                    | 60.8 (20.8 to 100)    | 38.4 (3.7 to 73.0)  |  |
| Ischemic heart disease        | 17.6 (12.3 to 22.8) | 21.5 (15.2 to 27.7) | 24 (14.6 to 33.3)   | 26.6 (18.8 to 34.4) | 17.7 (10.4 to 25.1) | 16.2 (12.5 to 19.9)    | 28.5 (4.8 to 52.3)  | 19 (3.9 to 34)      | 29.1 (13 to 45.1)   | 26.9 (9.8 to 44.0)  | 44.0 (24.5 to 63.5) | 42.1 (19.8 to 64.4) | 0                    | 45.3 (15.8 to 74.8)   | 8.3 (−7.3 to 24.0)  |  |
| Cognitive impairment symptoms | 4.6 (1.7 to 7.5)    | 5.6 (2.1 to 9.2)    | 6.2 (1.1 to 11.4)   | 5.6 (1.6 to 9.7)    | 4.1 (0.3 to 7.9)    | 6.5 (0.3 to 12.8)      | 3.7 (1.8 to 5.6)    | 3.8 (−3.5 to 11.1)  | 6.4 (−2.2 to 15.1)  | 0                   | 8.0 (−2.7 to 18.6)  | 5.3 (−4.8 to 15.3)  | 0                    | 0                     | 0                   |  |
| HIV                           | 6.5 (3.1 to 9.9)    | 5.3 (1.9 to 8.8)    | 13.8 (6.5 to 21.2)  | 8 (3.2 to 12.8)     | 7.3 (2.4 to 12.2)   | 8.2 (1.3 to 15.1)      | 7.1 (−6.4 to 20.7)  | 7 (4.4 to 9.6)      | 9.7 (−0.8 to 20.1)  | 16.8 (1.9 to 31.7)  | 23.9 (7.1 to 40.6)  | 10.5 (−3.3 to 24.3) | 0                    | 0                     | 8.3 (−7.3 to 24)    |  |
| High cholesterol              | 10.2 (6.1 to 14.4)  | 12.3 (7.3 to 17.3)  | 7.2 (1.3 to 13.1)   | 4.8 (1.1 to 8.6)    | 10.6 (5.1 to 16.0)  | 14.8 (5.8 to 23.7)     | 14.3 (−4.1 to 32.6) | 11.4 (−0.8 to 23.5) | 8.2 (5.4 to 11.0)   | 7.7 (−2.6 to 18.0)  | 12.0 (−0.8 to 24.9) | 15.9 (−0.6 to 32.4) | 11.8 (−10.1 to 33.8) | 9.0 (−7.9 to 26.0)    | 16.6 (−4.5 to 37.8) |  |
| Signs of alcohol problems     | 7.7 (4.1 to 11.4)   | 7.7 (3.7 to 11.8)   | 5.6 (0.4 to 10.7)   | 5.6 (1.6 to 9.7)    | 8.5 (3.3 to 13.7)   | 11.4 (3.4 to 19.4)     | 0                   | 16.5 (2.0 to 31.0)  | 6.4 (−2.2 to 15.1)  | 6.9 (4.3 to 9.4)    | 8 (−2.7 to 18.6)    | 0                   | 0                    | 9.0 (−7.9 to 26.0)    | 0                   |  |
| Tuberculosis                  | 5.1 (2 to 8.2)      | 3.2 (0.5 to 5.9)    | 11.6 (4.3 to 18.9)  | 12.1 (6.4 to 17.9)  | 4.8 (0.1 to 9.4)    | 18.1 (8.4 to 27.8)     | 14.3 (−4.1 to 32.6) | 22.7 (6.7 to 38.8)  | 9.7 (−0.8 to 20.2)  | 7.7 (−2.6 to 18.0)  | 6.7 (4.1 to 9.2)    | 15.8 (−0.7 to 32.2) | 0                    | 0                     | 0                   |  |
| Stroke                        | 4.9 (1.9 to 7.8)    | 4.2 (1.1 to 7.2)    | 10.6 (4.1 to 17.1)  | 7.3 (2.7 to 11.8)   | 8.4 (3.4 to 13.5)   | 13.1 (4.6 to 21.6)     | 7.1 (−6.4 to 20.7)  | 7.6 (−2.6 to 17.7)  | 9.7 (−0.8 to 20.2)  | 0                   | 11.9 (−0.8 to 24.6) | 5.0 (2.8 to 7.3)    | 0                    | 27.2 (0.9 to 53.6)    | 16.6 (−4.5 to 37.8) |  |
| Underweight                   | 2.1 (0.1 to 4.2)    | 0                   | 3.2 (−0.6 to 7)     | 2.6 (−0.3 to 5.6)   | 0                   | 0                      | 0                   | 0                   | 3.2 (−3.0 to 9.5)   | 0                   | 0                   | 0                   | 2.3 (0.7 to 3.8)     | 0                     | 0                   |  |
| Chronic cough, no TB          | 3.4 (0.9 to 5.9)    | 1.8 (−0.2 to 3.8)   | 2.5 (−1.2 to 6.2)   | 1.6 (−0.6 to 3.9)   | 4.6 (0.6 to 8.5)    | 8.2 (1.3 to 15.1)      | 0                   | 0                   | 3.2 (−3.0 to 9.4)   | 3.8 (−3.6 to 11.3)  | 0                   | 15.8 (−0.7 to 32.3) | 0                    | 2.9 (1.2 to 4.6)      | 8.3 (−7.3 to 24)    |  |
| Kidney disease                | 3.4 (0.9 to 5.9)    | 3.6 (0.8 to 6.4)    | 0                   | 2.4 (−0.3 to 5.1)   | 3.2 (−0.2 to 6.5)   | 1.6 (−1.6 to 4.8)      | 0                   | 3.8 (−3.5 to 11.1)  | 6.4 (−2.2 to 15.1)  | 0                   | 0                   | 10.5 (−3.3 to 24.3) | 0                    | 9.0 (−7.9 to 26.0)    | 3.2 (1.4 to 5.0)    |  |

N = 378 after multiple imputation of missing data. Top-left to bottom-right diagonal values represent the unconditional prevalence of the chronic condition.

**Table S2:** Prevalence of comorbidities among middle-aged and elderly women in peri-urban Tanzania (continued for women aged 60+ years)

| Prevalence % [95% CI]                | Index condition     |                     |                     |                     |                     |                        |                     |                     |                     |                     |                     |                     |                     |                       |                     |
|--------------------------------------|---------------------|---------------------|---------------------|---------------------|---------------------|------------------------|---------------------|---------------------|---------------------|---------------------|---------------------|---------------------|---------------------|-----------------------|---------------------|
|                                      | Hyper-tension       | Obese               | Anemia              | CES-D-10 score ≥10  | Diabetes            | Ischemic heart disease | Cognitive problems  | HIV                 | High cholesterol    | CAGE Score 2+       | Tuber-culosis       | Stroke              | Under-weight        | Chronic cough (no TB) | Kidney disease      |
| Comorbidity                          |                     |                     |                     |                     |                     |                        |                     |                     |                     |                     |                     |                     |                     |                       |                     |
| <b>Hypertension</b>                  | 71.2 (66.1 to 76.4) | 80.5 (72.5 to 88.5) | 67.1 (56.9 to 77.3) | 71.3 (62.9 to 79.7) | 70.9 (60.1 to 81.6) | 70.7 (59.7 to 81.8)    | 68.2 (56.5 to 80)   | 40.3 (9.8 to 70.8)  | 78.3 (61.4 to 95.2) | 75.0 (50.4 to 99.6) | 44.6 (18.7 to 70.6) | 78.9 (60.6 to 97.3) | 58.8 (38.9 to 78.7) | 73.6 (53.7 to 93.5)   | 78.9 (60.5 to 97.3) |
| <b>Anemia</b>                        | 37.2 (30.6 to 43.8) | 32.9 (27.5 to 38.3) | 27.9 (17.8 to 38)   | 33.2 (24.3 to 42.2) | 38.1 (26.8 to 49.3) | 36.7 (24.7 to 48.7)    | 16.1 (5.6 to 26.5)  | 0                   | 65 (45.4 to 84.6)   | 27.6 (1.1 to 54.2)  | 27.6 (4.4 to 50.8)  | 25.9 (6.3 to 45.5)  | 0                   | 26.6 (6.4 to 46.8)    | 46.8 (24.4 to 69.3) |
| <b>Obese</b>                         | 35 (25.9 to 44.2)   | 31.4 (19.9 to 42.9) | 37.2 (29.4 to 45)   | 39.1 (27.0 to 51.2) | 34.0 (21.8 to 46.2) | 45.1 (29.3 to 60.9)    | 46.3 (30 to 62.6)   | 48 (10.5 to 85.4)   | 22.7 (0.4 to 45.0)  | 46.3 (13.4 to 79.2) | 42.3 (9.4 to 75.3)  | 48.8 (21.2 to 76.4) | 54.9 (28.6 to 81.2) | 25.8 (–2.2 to 53.9)   | 38.2 (9.6 to 66.7)  |
| <b>Signs of depression</b>           | 38.1 (31.6 to 44.6) | 38.4 (28.7 to 48.1) | 40.0 (29.3 to 50.7) | 38.1 (32.6 to 43.5) | 36.4 (25.1 to 47.7) | 62.1 (50.4 to 73.9)    | 43.9 (31.5 to 56.3) | 30.4 (1.7 to 59.1)  | 22.0 (4.9 to 39)    | 8.8 (–7.6 to 25.2)  | 60.6 (35.8 to 85.3) | 40.6 (19.0 to 62.2) | 50.7 (30.7 to 70.8) | 22.7 (3.5 to 41.9)    | 32.2 (11.1 to 53.3) |
| <b>Diabetes</b>                      | 33.8 (24.4 to 43.2) | 39.2 (26.8 to 51.6) | 31.0 (19.4 to 42.6) | 32.5 (20.6 to 44.4) | 33.9 (26.3 to 41.6) | 30.0 (15.8 to 44.3)    | 38.2 (21.8 to 54.6) | 38.5 (1.7 to 75.3)  | 45.5 (20.9 to 70.2) | 42.6 (8.9 to 76.3)  | 0                   | 48.2 (19.6 to 76.8) | 29.1 (5.9 to 52.4)  | 55.1 (25 to 85.1)     | 37.6 (8.1 to 67.1)  |
| <b>Ischemic heart disease</b>        | 21.1 (15.7 to 26.5) | 23.7 (15.3 to 32.1) | 25.8 (16.3 to 35.3) | 34.7 (26.0 to 43.3) | 18.8 (10.0 to 27.5) | 21.2 (16.7 to 25.8)    | 24.6 (14.1 to 35.1) | 0                   | 26.1 (8.1 to 44.0)  | 41.4 (13.4 to 69.3) | 26.9 (4.4 to 49.5)  | 15.4 (–0.6 to 31.4) | 23.1 (6.3 to 39.9)  | 10.9 (–3.3 to 25)     | 31.3 (10.5 to 52.2) |
| <b>Cognitive impairment symptoms</b> | 20.3 (14.9 to 25.7) | 10.3 (3.6 to 17.0)  | 26.4 (16.8 to 36.1) | 24.4 (16.5 to 32.3) | 23.8 (13.9 to 33.7) | 24.5 (14.1 to 34.9)    | 21.2 (16.6 to 25.7) | 0                   | 0                   | 17.2 (–4.4 to 38.9) | 13.7 (–3.9 to 31.3) | 24.1 (4.5 to 43.6)  | 42.5 (22.8 to 62.1) | 43.8 (21.4 to 66.1)   | 16.8 (–0.3 to 33.9) |
| <b>HIV</b>                           | 1.8 (0 to 3.6)      | 0                   | 4.2 (0 to 8.4)      | 2.6 (–0.3 to 5.5)   | 3.7 (–0.5 to 7.9)   | 0                      | 0                   | 3.2 (1.3 to 5.2)    | 0                   | 0                   | 0                   | 0                   | 3.9 (–3.6 to 11.3)  | 0                     | 0                   |
| <b>High cholesterol</b>              | 8.1 (4.5 to 11.8)   | 14.6 (7.7 to 21.5)  | 4.5 (–0.2 to 9.2)   | 4.3 (0.6 to 8)      | 10.0 (3.4 to 16.5)  | 9.1 (2.1 to 16.1)      | 0                   | 0                   | 7.4 (4.5 to 10.3)   | 16.6 (–4.5 to 37.6) | 13.1 (–3.9 to 30.2) | 14.9 (–0.7 to 30.5) | 0                   | 5.3 (–4.8 to 15.4)    | 15.6 (–0.7 to 32)   |
| <b>Signs of alcohol problems</b>     | 4.1 (1.5 to 6.7)    | 3.3 (–0.3 to 6.8)   | 4.9 (0.5 to 9.2)    | 0.9 (–0.9 to 2.7)   | 4.9 (0.1 to 9.6)    | 7.6 (1.2 to 13.9)      | 3.2 (–1.2 to 7.5)   | 0                   | 8.7 (–2.9 to 20.2)  | 3.9 (1.7 to 6)      | 0                   | 9.9 (–3.2 to 23)    | 4.2 (–3.8 to 12.2)  | 10.3 (–3.3 to 24.0)   | 0                   |
| <b>Tuberculosis</b>                  | 3.1 (0.7 to 5.4)    | 4.1 (0.2 to 8.0)    | 5.6 (0.4 to 10.8)   | 7.8 (2.9 to 12.7)   | 0                   | 6.2 (0.3 to 12.1)      | 3.2 (–1.2 to 7.5)   | 0                   | 8.7 (–2.9 to 20.2)  | 0                   | 4.9 (2.5 to 7.3)    | 15.4 (–0.7 to 31.4) | 8.6 (–2.8 to 20)    | 0                     | 5.3 (–4.8 to 15.3)  |
| <b>Stroke</b>                        | 7.2 (3.7 to 10.6)   | 5.1 (0.8 to 9.5)    | 8.5 (2.6 to 14.5)   | 6.9 (2.3 to 11.6)   | 9.2 (2.7 to 15.8)   | 4.7 (–0.5 to 9.9)      | 7.4 (0.8 to 14)     | 0                   | 13 (–0.8 to 26.8)   | 16.6 (–4.5 to 37.8) | 20.4 (–0.1 to 40.9) | 6.5 (3.7 to 9.2)    | 8.9 (–2.7 to 20.5)  | 21.0 (2.6 to 39.4)    | 16.0 (–0.6 to 32.5) |
| <b>Underweight</b>                   | 7.2 (3.5 to 10.8)   | 0                   | 12.8 (5.4 to 20.2)  | 11.6 (5.4 to 17.8)  | 7.4 (1.2 to 13.6)   | 9.4 (2 to 16.9)        | 17.4 (7.4 to 27.5)  | 10.3 (–8.8 to 29.4) | 0                   | 9.4 (–7.9 to 26.7)  | 15.2 (–3.9 to 34.4) | 11.8 (–3.1 to 26.8) | 8.7 (5.4 to 12.0)   | 8.3 (–5.7 to 22.4)    | 11.4 (–3.3 to 26.2) |
| <b>Chronic cough, no TB</b>          | 6.5 (3.2 to 9.8)    | 5.1 (0.7 to 9.4)    | 4.4 (–0.7 to 9.4)   | 3.8 (0.2 to 7.4)    | 10.2 (3.2 to 17.2)  | 3.2 (–1.2 to 7.6)      | 13 (4.6 to 21.4)    | 0                   | 4.5 (–4.1 to 13.1)  | 16.7 (–4.5 to 37.9) | 0                   | 20.3 (2.5 to 38)    | 6.1 (–4.4 to 16.5)  | 6.3 (3.5 to 9.0)      | 10.8 (–3.3 to 25)   |
| <b>Kidney disease</b>                | 6.8 (3.5 to 10.2)   | 8.8 (3.3 to 14.3)   | 6.3 (1.0 to 11.7)   | 5.2 (1.1 to 9.3)    | 6.8 (0.8 to 12.9)   | 9.1 (2.1 to 16.1)      | 4.9 (–0.5 to 10.3)  | 0                   | 13 (–0.8 to 26.8)   | 0                   | 6.6 (–6 to 19.2)    | 15.2 (–0.7 to 31)   | 8.2 (–2.7 to 19.1)  | 10.7 (–3.3 to 24.6)   | 6.2 (3.5 to 8.9)    |

N = 312 after multiple imputation of missing data. Top-left to bottom-right diagonal values represent the unconditional prevalence of the chronic condition.

**Table S3:** Prevalence and extent of multimorbidity among middle-aged and elderly women in peri-urban Tanzania, by age-group

| Number of chronic conditions or health areas affected | Age group | Prevalence of chronic conditions % (95% CI) | Prevalence of health areas affected % (95% CI) |
|-------------------------------------------------------|-----------|---------------------------------------------|------------------------------------------------|
| 0                                                     | 40–44     | 9.7 (6.4 to 12.9)                           | 9.7 (6.4 to 12.9)                              |
|                                                       | 45–49     | 6.6 (3.5 to 9.7)                            | 6.6 (3.5 to 9.7)                               |
|                                                       | 50–54     | 4.3 (1.3 to 7.3)                            | 4.3 (1.3 to 7.3)                               |
|                                                       | 55–59     | 6.7 (2.5 to 10.9)                           | 6.7 (2.5 to 10.9)                              |
|                                                       | 60–64     | 3.3 (0 to 6.7)                              | 3.3 (0 to 6.7)                                 |
|                                                       | 65–69     | 2.3 (–1.4 to 6.1)                           | 2.3 (–1.4 to 6.1)                              |
|                                                       | 70+       | 0                                           | 0                                              |
| 1                                                     | 40–44     | 26.2 (21.6 to 30.8)                         | 54 (49.1 to 58.9)                              |
|                                                       | 45–49     | 21.9 (16.7 to 27.2)                         | 56.8 (51.2 to 62.5)                            |
|                                                       | 50–54     | 19.1 (12.9 to 25.3)                         | 51.5 (44.9 to 58.2)                            |
|                                                       | 55–59     | 15.6 (9.4 to 21.9)                          | 55.7 (47.9 to 63.5)                            |
|                                                       | 60–64     | 15.5 (8.3 to 22.6)                          | 51.1 (42.3 to 59.8)                            |
|                                                       | 65–69     | 10.3 (2.1 to 18.5)                          | 47.1 (36.0 to 58.3)                            |
|                                                       | 70+       | 7.4 (1.6 to 13.3)                           | 27.6 (18.5 to 36.7)                            |
| 2                                                     | 40–44     | 25.9 (21.2 to 30.6)                         | 31.7 (27.4 to 36.1)                            |
|                                                       | 45–49     | 32.6 (26.7 to 38.6)                         | 31.2 (26.1 to 36.4)                            |
|                                                       | 50–54     | 26.9 (20.3 to 33.5)                         | 38.0 (31.7 to 44.4)                            |
|                                                       | 55–59     | 29.1 (21.3 to 37.0)                         | 32.3 (25.2 to 39.5)                            |
|                                                       | 60–64     | 30.5 (20.9 to 40.1)                         | 42.5 (34.0 to 51.1)                            |
|                                                       | 65–69     | 29.4 (17.3 to 41.5)                         | 45.4 (34.2 to 56.5)                            |
|                                                       | 70+       | 17.5 (7.7 to 27.2)                          | 69.2 (59.8 to 78.6)                            |
| 3                                                     | 40–44     | 20.8 (16.4 to 25.2)                         | 4.6 (2.6 to 6.5)                               |
|                                                       | 45–49     | 21.6 (16.5 to 26.7)                         | 5.3 (2.9 to 7.8)                               |
|                                                       | 50–54     | 24.7 (18.1 to 31.2)                         | 6.2 (3.0 to 9.3)                               |
|                                                       | 55–59     | 24.1 (16.5 to 31.7)                         | 5.3 (1.9 to 8.6)                               |
|                                                       | 60–64     | 23.1 (14.6 to 31.5)                         | 3.1 (0.1 to 6.0)                               |
|                                                       | 65–69     | 29.3 (17.1 to 41.4)                         | 5.2 (0 to 10.4)                                |
|                                                       | 70+       | 26.2 (15.0 to 37.5)                         | 3.2 (–0.4 to 6.8)                              |
| 4                                                     | 40–44     | 11.8 (8.4 to 15.2)                          |                                                |
|                                                       | 45–49     | 10.1 (6.2 to 14.0)                          |                                                |
|                                                       | 50–54     | 13.8 (8.5 to 19.1)                          |                                                |
|                                                       | 55–59     | 12.2 (6.3 to 18.0)                          |                                                |
|                                                       | 60–64     | 14.2 (6.8 to 21.6)                          |                                                |
|                                                       | 65–69     | 15.2 (5.5 to 24.9)                          |                                                |
|                                                       | 70+       | 26.9 (16.3 to 37.6)                         |                                                |
| 5+                                                    | 40–44     | 5.6 (3.2 to 8.0)                            |                                                |
|                                                       | 45–49     | 7.1 (4.1 to 10.1)                           |                                                |
|                                                       | 50–54     | 11.3 (6.7 to 15.8)                          |                                                |
|                                                       | 55–59     | 12.2 (6.9 to 17.5)                          |                                                |
|                                                       | 60–64     | 13.4 (6.8 to 20.1)                          |                                                |
|                                                       | 65–69     | 13.5 (5.1 to 21.9)                          |                                                |
|                                                       | 70+       | 21.9 (12.3 to 31.5)                         |                                                |

N = 1528 after multiple imputation of missing data.

**Table S3:** Prevalence and extent of multimorbidity among middle-aged and elderly women in peri-urban Tanzania, by age-group (continued)

| Number of chronic conditions or health areas affected | Age group | Prevalence of chronic conditions % (95% CI) | Prevalence of health areas affected % (95% CI) |
|-------------------------------------------------------|-----------|---------------------------------------------|------------------------------------------------|
| 0–1                                                   | 40–44     | 35.9 (31.0 to 40.7)                         | 63.7 (59.2 to 68.2)                            |
|                                                       | 45–49     | 28.5 (22.8 to 34.3)                         | 63.4 (58.2 to 68.7)                            |
|                                                       | 50–54     | 23.4 (16.9 to 29.8)                         | 55.8 (49.3 to 62.3)                            |
|                                                       | 55–59     | 22.3 (15.3 to 29.3)                         | 62.4 (55.0 to 69.8)                            |
|                                                       | 60–64     | 18.8 (11.2 to 26.4)                         | 54.4 (45.8 to 63.0)                            |
|                                                       | 65–69     | 12.6 (4.0 to 21.3)                          | 49.5 (38.4 to 60.5)                            |
|                                                       | 70+       | 7.4 (1.6 to 13.3)                           | 27.6 (18.5 to 36.7)                            |
| 2+                                                    | 40–44     | 64.1 (59.3 to 69.0)                         | 36.3 (31.8 to 40.8)                            |
|                                                       | 45–49     | 71.5 (65.7 to 77.2)                         | 36.6 (31.3 to 41.8)                            |
|                                                       | 50–54     | 76.6 (70.2 to 83.1)                         | 44.2 (37.7 to 50.7)                            |
|                                                       | 55–59     | 77.7 (70.7 to 84.7)                         | 37.6 (30.2 to 45.0)                            |
|                                                       | 60–64     | 81.2 (73.6 to 88.8)                         | 45.6 (37.0 to 54.2)                            |
|                                                       | 65–69     | 87.4 (78.7 to 96.0)                         | 50.5 (39.5 to 61.6)                            |
|                                                       | 70+       | 92.6 (86.7 to 98.4)                         | 72.4 (63.3 to 81.5)                            |
| 0–2                                                   | 40–44     | 61.7 (56.8 to 66.7)                         |                                                |
|                                                       | 45–49     | 61.2 (55.2 to 67.1)                         |                                                |
|                                                       | 50–54     | 50.3 (43.1 to 57.5)                         |                                                |
|                                                       | 55–59     | 51.5 (43.1 to 59.8)                         |                                                |
|                                                       | 60–64     | 49.3 (39.3 to 59.3)                         |                                                |
|                                                       | 65–69     | 42.1 (29.2 to 54.9)                         |                                                |
|                                                       | 70+       | 24.9 (14.5 to 35.3)                         |                                                |
| 3+                                                    | 40–44     | 38.3 (33.3 to 43.2)                         |                                                |
|                                                       | 45–49     | 38.8 (32.9 to 44.8)                         |                                                |
|                                                       | 50–54     | 49.7 (42.5 to 56.9)                         |                                                |
|                                                       | 55–59     | 48.5 (40.2 to 56.9)                         |                                                |
|                                                       | 60–64     | 50.7 (40.7 to 60.7)                         |                                                |
|                                                       | 65–69     | 57.9 (45.1 to 70.8)                         |                                                |
|                                                       | 70+       | 75.1 (64.7 to 85.5)                         |                                                |
| 0–3                                                   | 40–44     | 82.6 (78.7 to 86.4)                         |                                                |
|                                                       | 45–49     | 82.8 (78.2 to 87.4)                         |                                                |
|                                                       | 50–54     | 74.9 (68.6 to 81.2)                         |                                                |
|                                                       | 55–59     | 75.6 (68.3 to 82.9)                         |                                                |
|                                                       | 60–64     | 72.4 (63.7 to 81.0)                         |                                                |
|                                                       | 65–69     | 71.3 (60.0 to 82.6)                         |                                                |
|                                                       | 70+       | 51.2 (39.3 to 63.0)                         |                                                |
| 4+                                                    | 40–44     | 17.4 (13.6 to 21.3)                         |                                                |
|                                                       | 45–49     | 17.2 (12.6 to 21.8)                         |                                                |
|                                                       | 50–54     | 25.1 (18.8 to 31.4)                         |                                                |
|                                                       | 55–59     | 24.4 (17.1 to 31.7)                         |                                                |
|                                                       | 60–64     | 27.6 (19.0 to 36.3)                         |                                                |
|                                                       | 65–69     | 28.7 (17.4 to 40.0)                         |                                                |
|                                                       | 70+       | 48.8 (37.0 to 60.7)                         |                                                |

N = 1528 after multiple imputation of missing data.

**Figure S1:** Comorbidity patterns among middle-aged and elderly women in peri-urban Tanzania, by age group

(a) 40–49 years

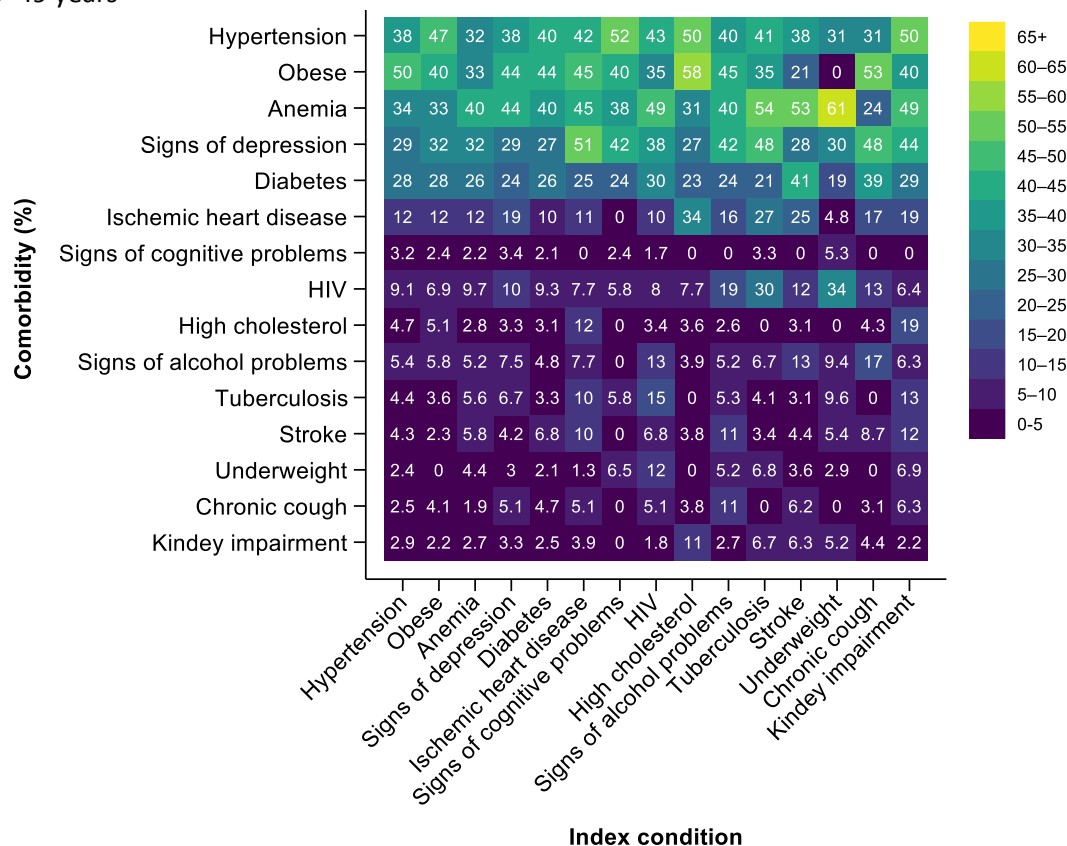

(b) 50–59 years

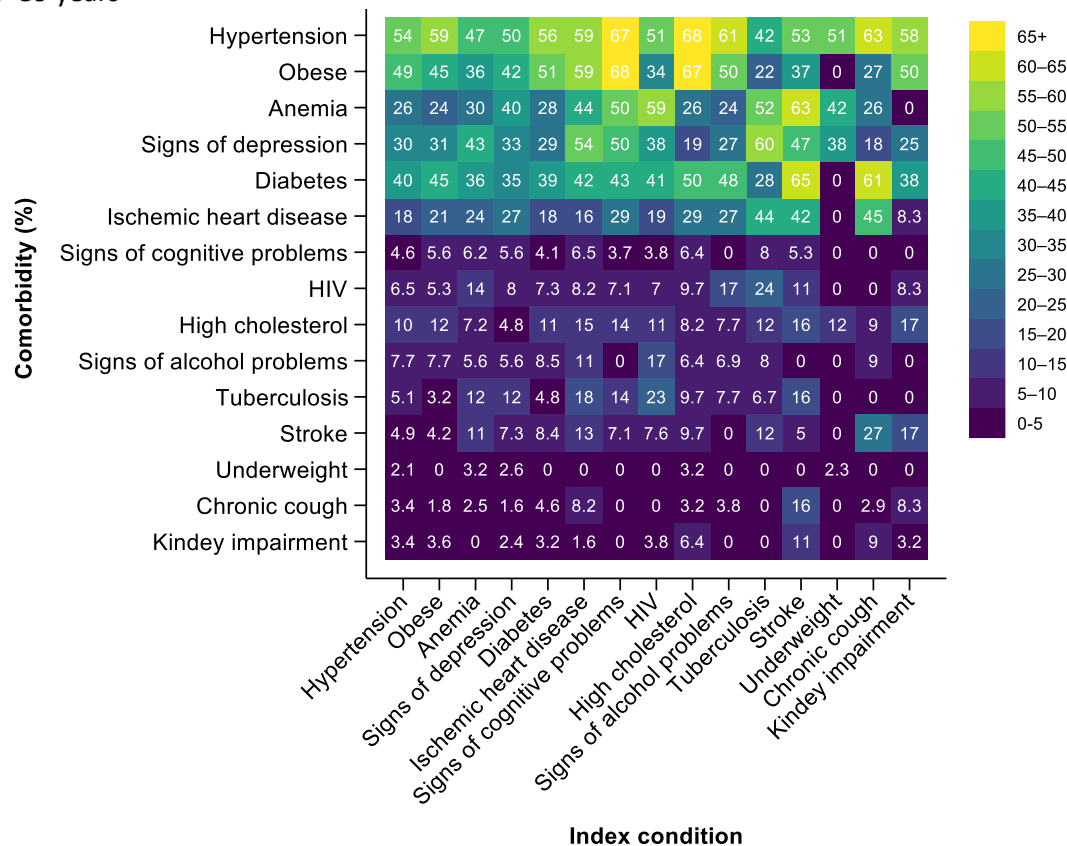

(d) 60+ years

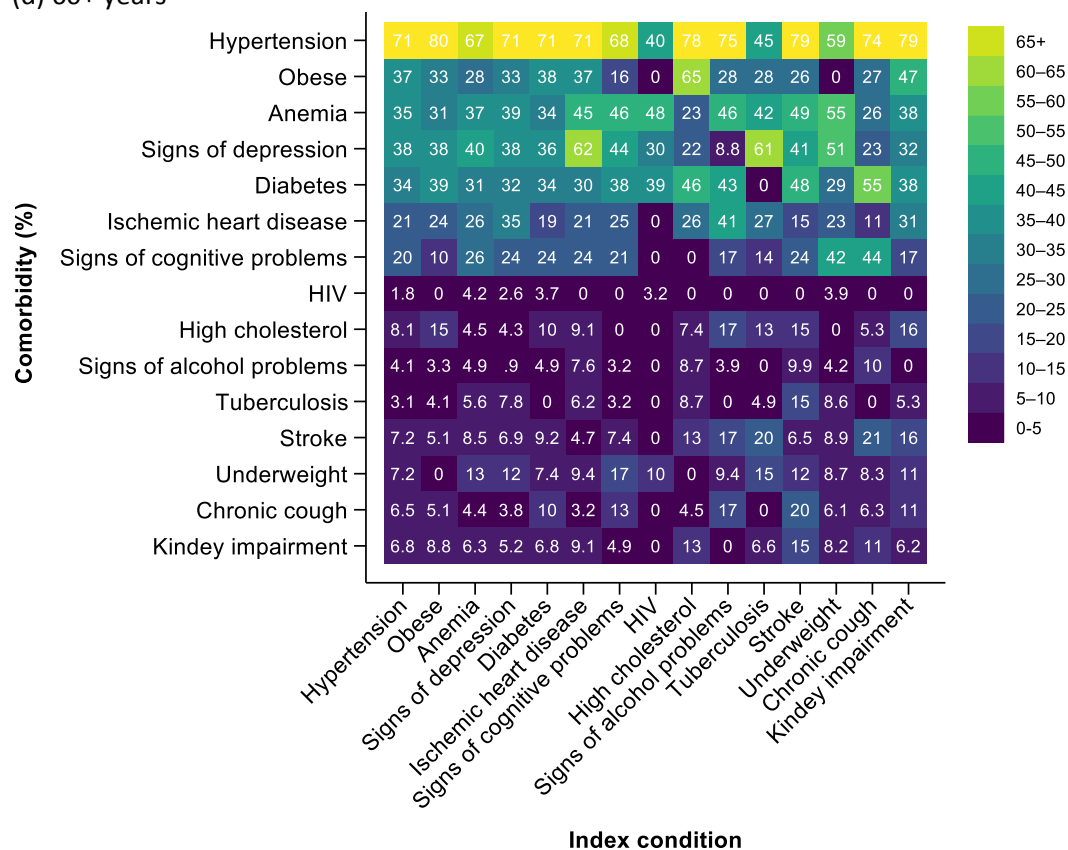

N = 733, 378 and 312, respectively, after multiple imputation of missing data. Off-diagonal values represent the conditional prevalence of a comorbidity given the presence of the index condition. Top-left to bottom-right diagonal values represent the unconditional prevalence of the chronic condition. Data with 95% confidence intervals are provided in **supplementary Table S2**.
